# Supplementary material
Source: bioRxiv or medRxiv preprint supplement (https://www.biorxiv.org/highwire/filestream/72700/field_highwire_adjunct_files/3/237255-2.pdf)
Supplement: Supplementary file [file 237255-2.pdf]

**Table S2. KOG functional annotation of *V. nonalfalae* predicted secretome**

| <b>KOG accession</b>                      | <b>KOG description</b>                                        | <b>Number of hits</b> |
|-------------------------------------------|---------------------------------------------------------------|-----------------------|
| <b>CELLULAR PROCESSING AND SIGNALING</b>  |                                                               | <b>159</b>            |
| M                                         | cell wall/membrane/envelope biogenesis                        | 14                    |
| N                                         | cell motility                                                 | 0                     |
| O                                         | posttranslational modification, protein turnover, chaperones  | 85                    |
| T                                         | signal transduction mechanisms                                | 32                    |
| U                                         | intracellular trafficking, secretion, and vesicular transport | 11                    |
| V                                         | defense mechanisms                                            | 3                     |
| W                                         | extracellular structures                                      | 10                    |
| Y                                         | nuclear structure                                             | 0                     |
| Z                                         | cytoskeleton                                                  | 4                     |
| <b>METABOLISM</b>                         |                                                               | <b>138</b>            |
| C                                         | energy production and conversion                              | 25                    |
| D                                         | cell cycle control, cell division, chromosome partitioning    | 2                     |
| E                                         | amino acid transport and metabolism                           | 15                    |
| F                                         | nucleotide transport and metabolism                           | 5                     |
| G                                         | carbohydrate transport and metabolism                         | 44                    |
| H                                         | coenzyme transport and metabolism                             | 2                     |
| I                                         | lipid transport and metabolism                                | 17                    |
| P                                         | inorganic ion transport and metabolism                        | 15                    |
| Q                                         | secondary metabolites biosynthesis, transport and catabolism  | 13                    |
| <b>INFORMATION STORAGE AND PROCESSING</b> |                                                               | <b>23</b>             |
| A                                         | RNA processing and modification                               | 5                     |
| B                                         | chromatin structure and dynamics                              | 3                     |
| J                                         | translation, ribosomal structure and biogenesis               | 8                     |
| K                                         | transcription                                                 | 4                     |
| L                                         | replication, recombination and repair                         | 3                     |
| <b>POORLY CHARACTERIZED</b>               |                                                               | <b>85</b>             |
| R                                         | general function prediction only                              | 65                    |
| S                                         | function unknown                                              | 20                    |
